# Supplementary material
Source: ML conference proceedings conference paper supplement (https://openreview.net/forum?id=CtBKITrZgp)

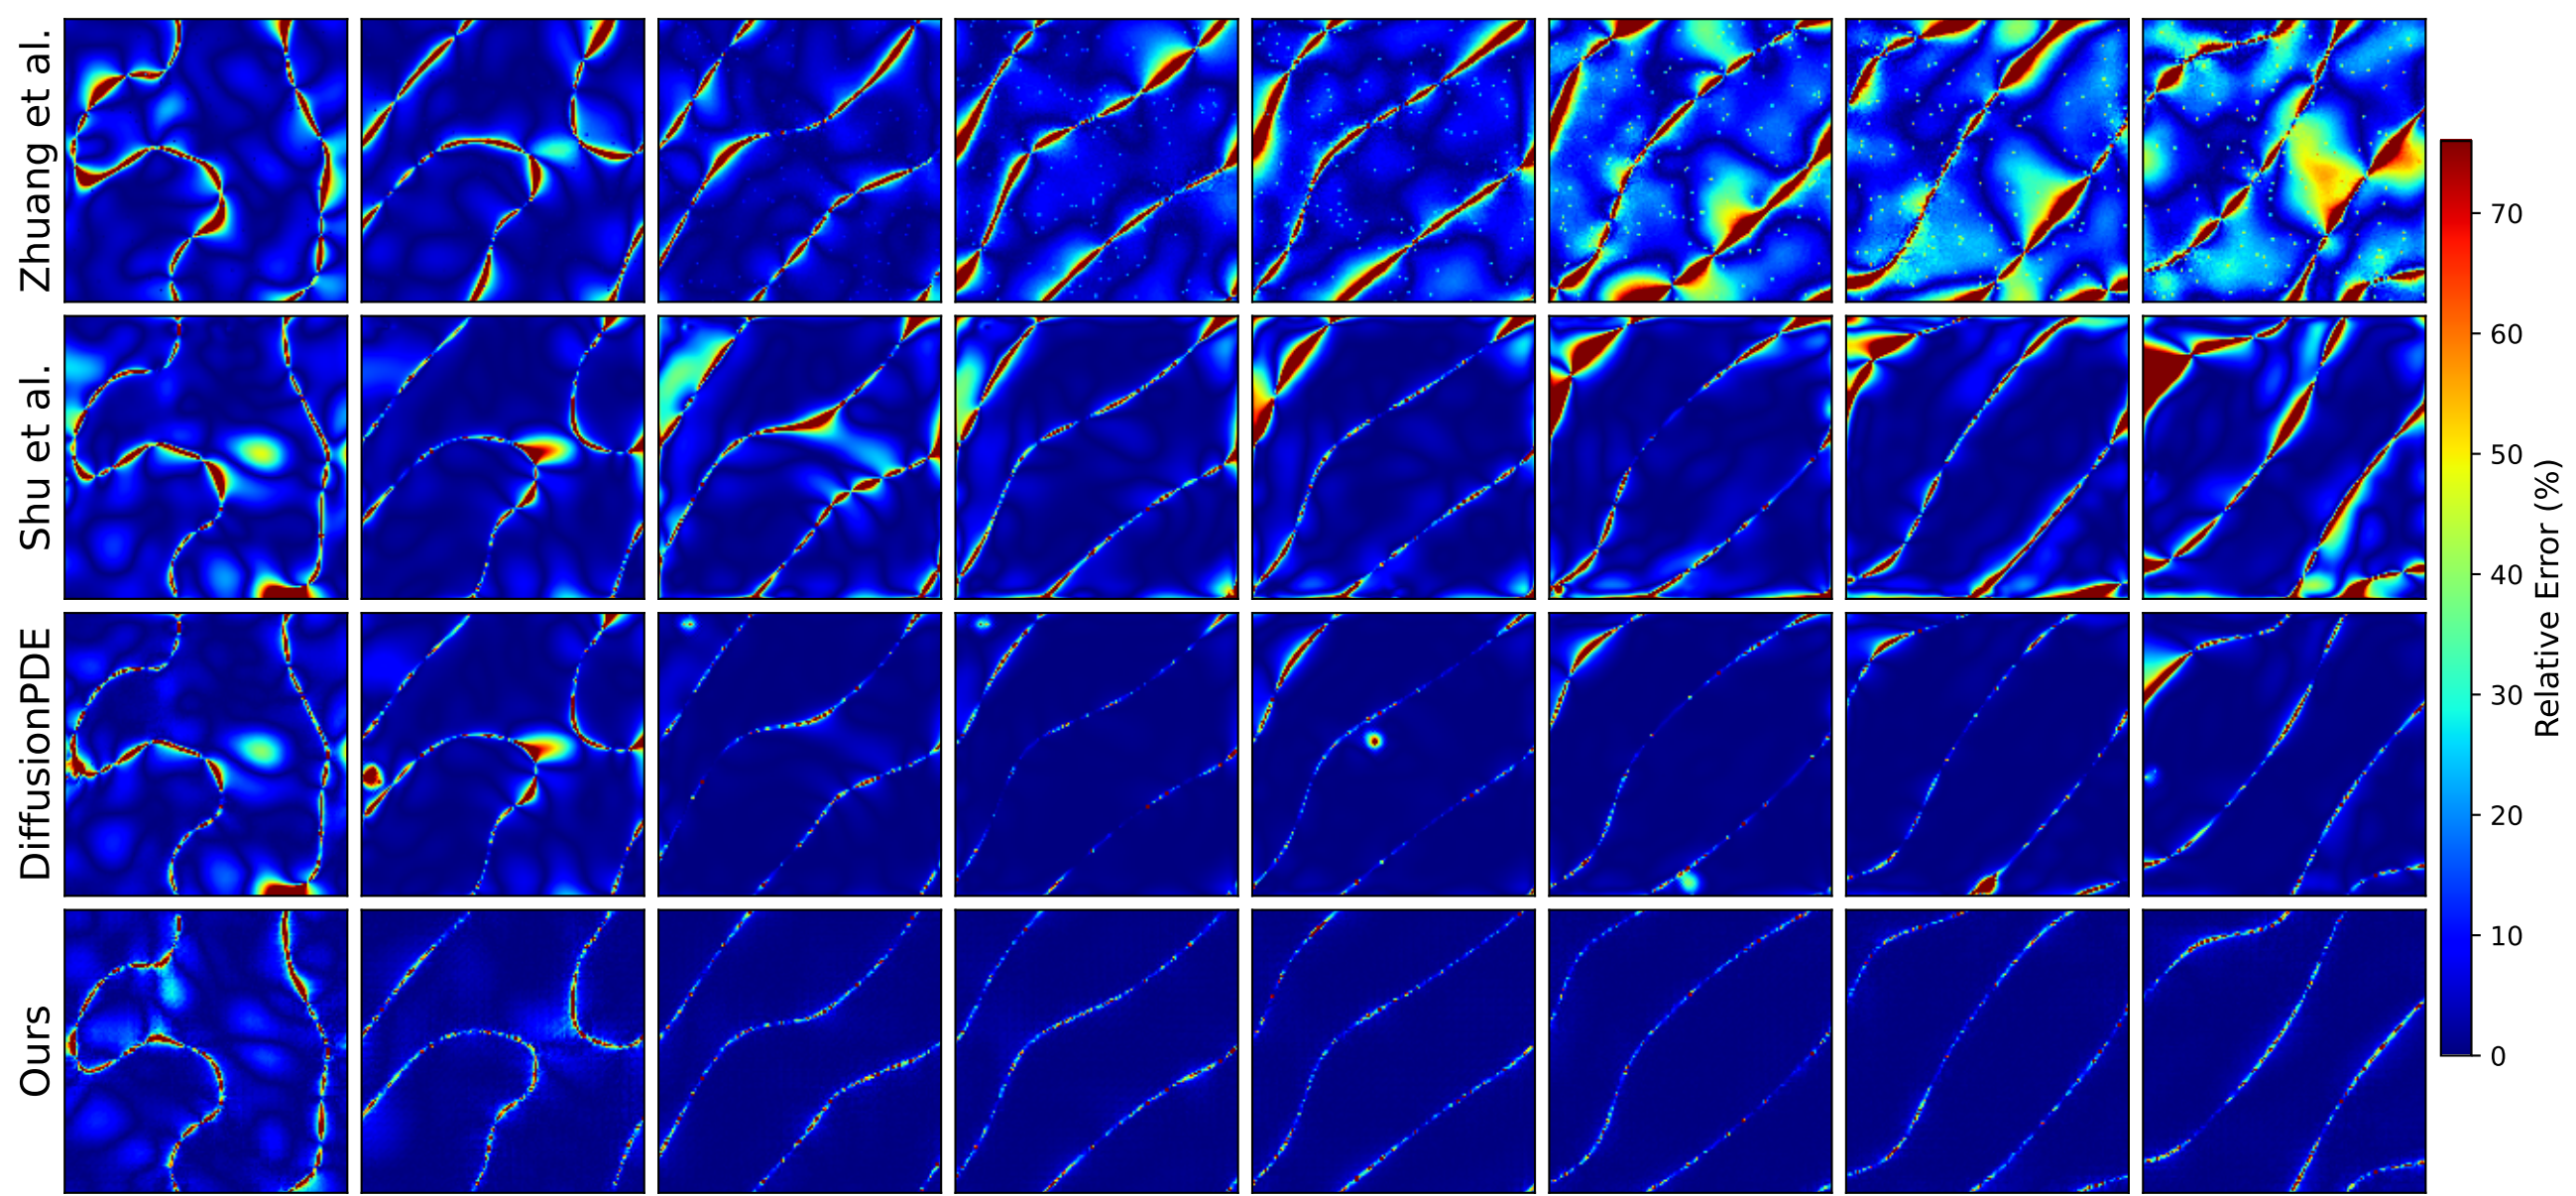

Supplement: supplementary_material [file error_map_grid.pdf › supplementary/static/images/error_map_grid.pdf]
